# Supplementary material for: Indoor penetration of ambient particulate pollution in a hospital maternity ward in Manila, Philippines: perspectives towards holistic city-level air quality management
Source: Royal Society of Chemistry journal article supplement (doi:10.1039/d4ea00160e), 2025-01-01
Supplement: d4ea00160e1.pdf [file d4ea00160e1.pdf]

## Supplementary Information

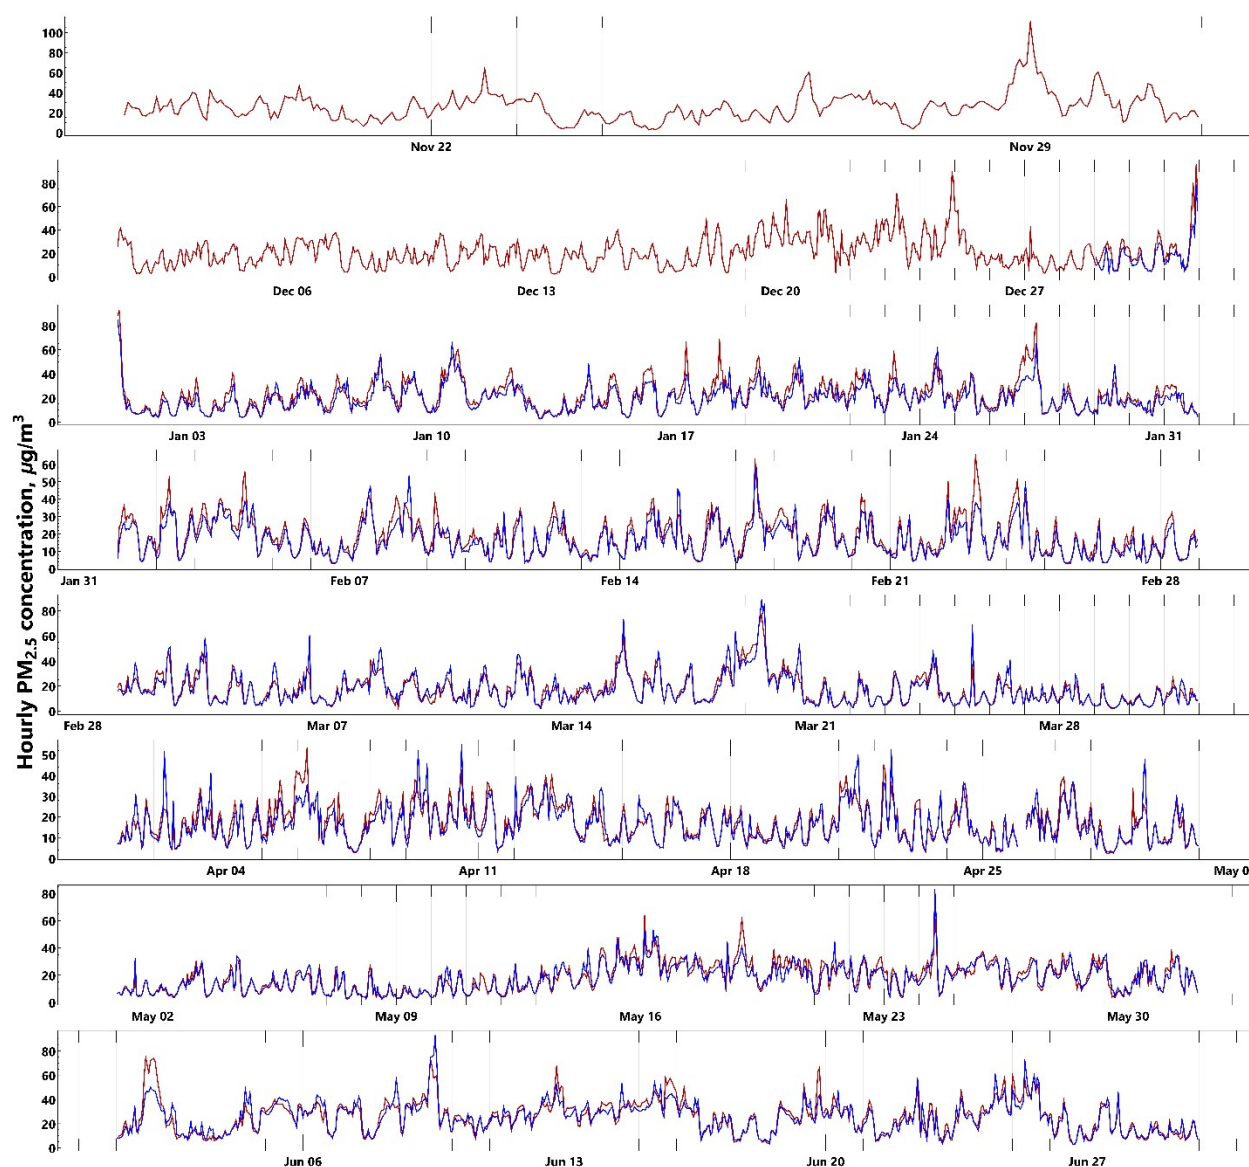

**Fig. 6.** Hourly measurements were taken indoors and outdoors during the measurement periods.

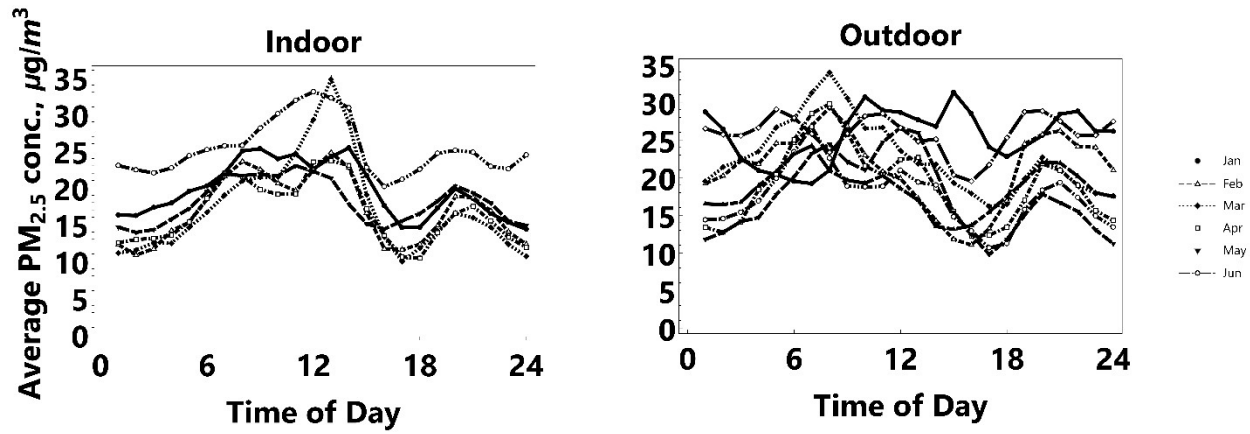

**Fig. 7.** Indoor and outdoor diurnal averages. Each line corresponds to a different month. Only January to June 2022 is shown in the plots to compare indoor and outdoor data easily. November and December were not included because the indoor sampling started in late December.
